# Supplementary material for: The SQSTM1/p62 UBA domain regulates Ajuba localisation, degradation and NF-κB signalling function
Source: PubMed Central journal article supplement (PMC8568271; doi:10.1371/journal.pone.0259556), 2021-11-04
Supplement: pone.0259556.s001.pdf [file pone.0259556.s001.pdf]

a)

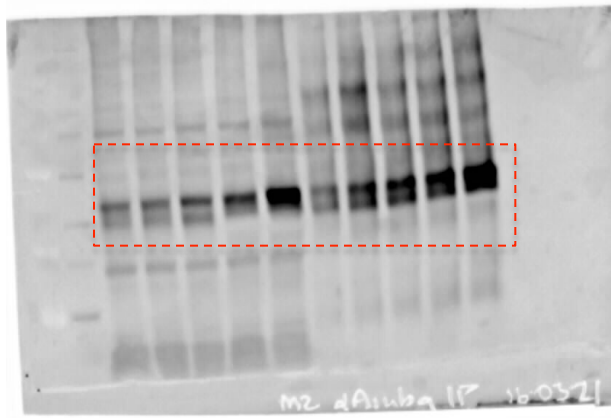

b)

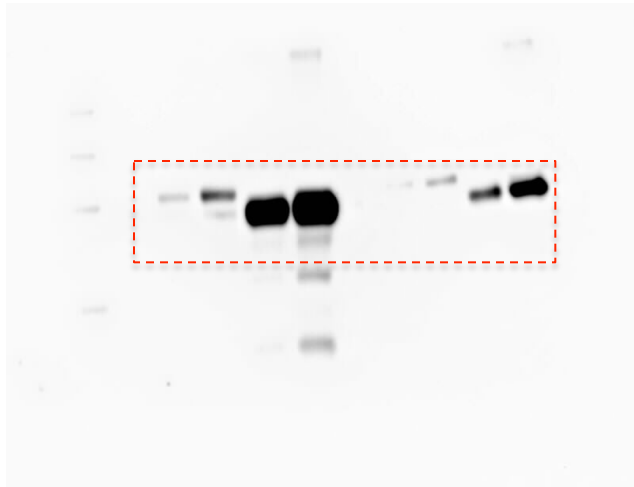

c)

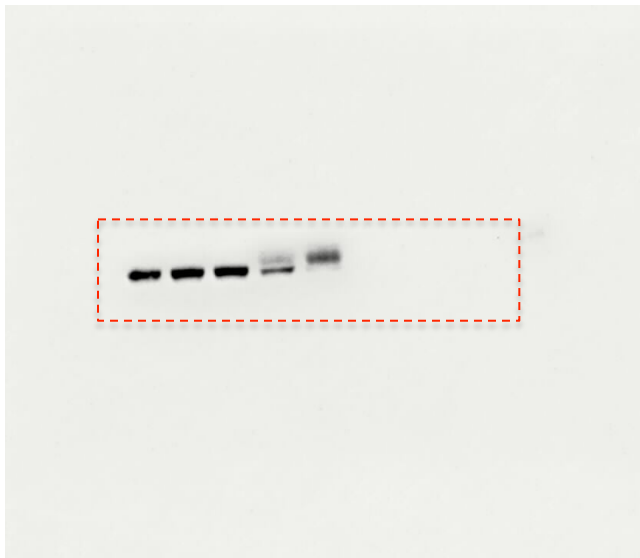

**Fig S1. Ajuba interaction with UBA-deficient p62 is significantly greater than interaction with wild type – blot images. a) anti-Ajuba, b) anti-FLAG (p62) and c) anti- $\alpha$ -tubulin. Lane order: molecular weight marker, loading controls: empty vector, 1  $\mu$ g FLAG-p62 WT, 4  $\mu$ g FLAG-p62 WT, 1  $\mu$ g FLAG-p62  $\Delta$ UBA, 4  $\mu$ g FLAG-p62  $\Delta$ UBA, IP eluates: empty vector, 1  $\mu$ g FLAG-p62 WT, 4  $\mu$ g FLAG-p62 WT, 1  $\mu$ g FLAG-p62  $\Delta$ UBA, 4  $\mu$ g FLAG-p62  $\Delta$ UBA.**

a)

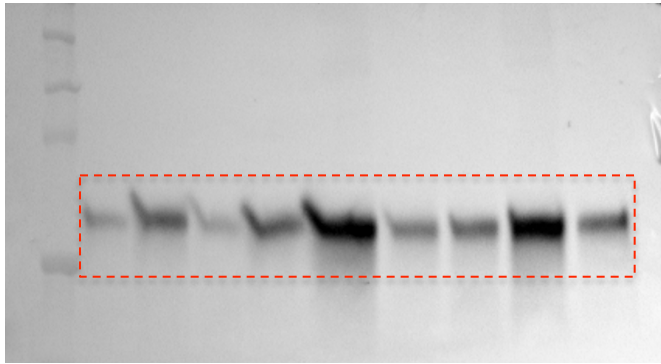

b)

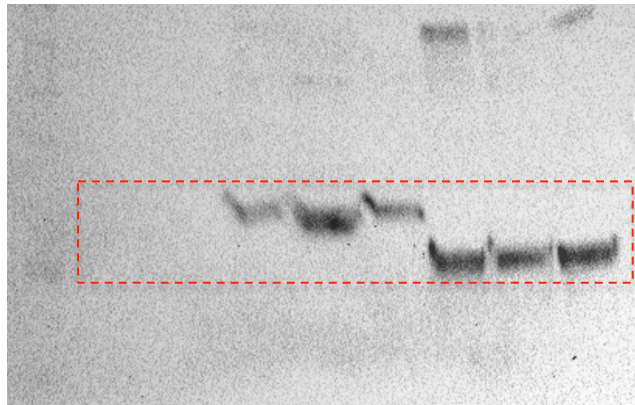

c)

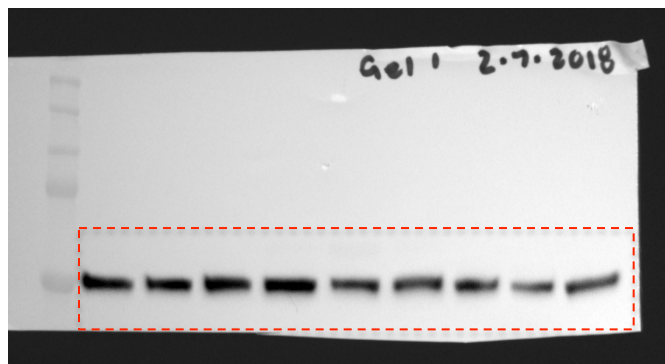

**Fig S2. Proteasomal stress enhances the protective effect of p62 on Ajuba levels – blot images.** A) anti-His (Ajuba), b) anti-FLAG (p62) and anti- $\alpha$ -tubulin. Lane order: molecular weight marker, empty vector no-treatment, MG132, serum starvation plus bafilomycin, FLAG-p62 wild type no-treatment, MG132, serum starvation plus bafilomycin, FLAG-p62  $\Delta$ UBA no-treatment, MG132, serum starvation plus bafilomycin.

Gel 1

Gel 2

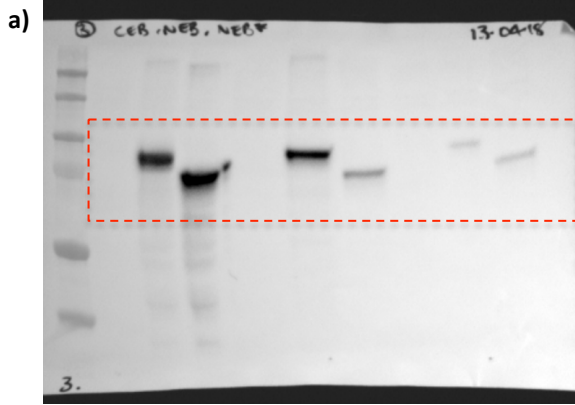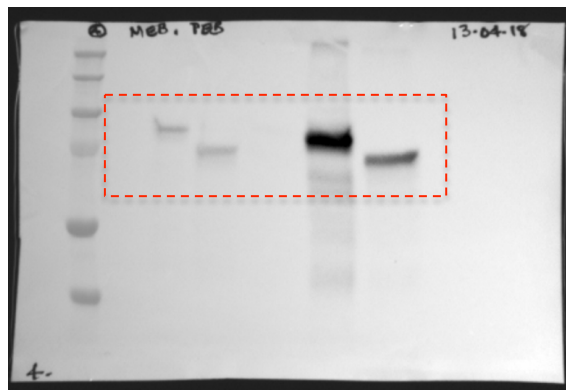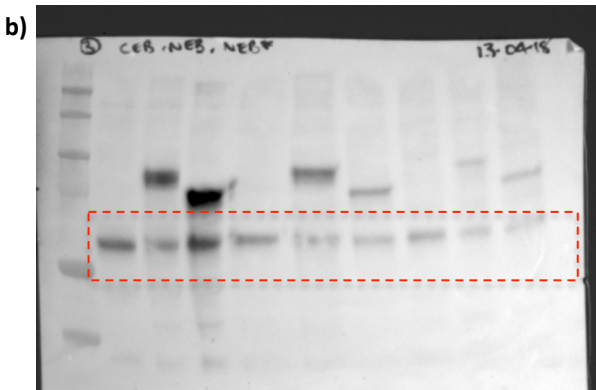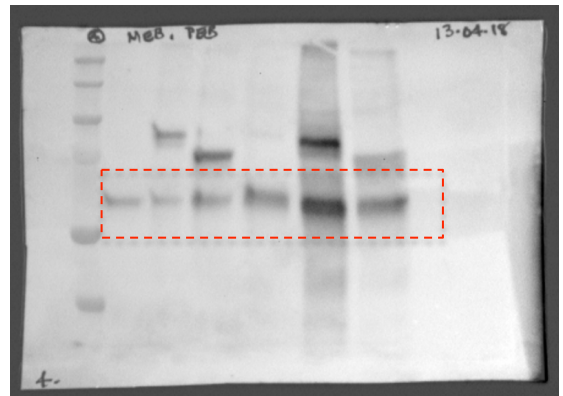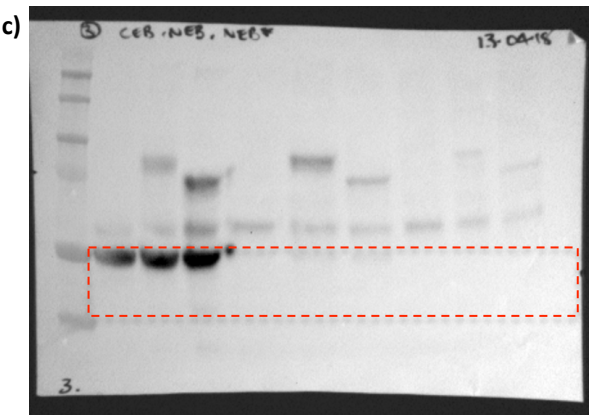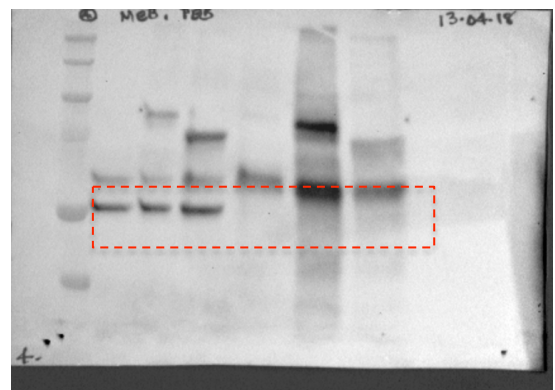

**Fig S3. Increased expression of wild type p62 leads to a shift of Ajuba from the chromatin-bound fraction to the cytoskeleton – blot images.** A) anti-FLAG (p62), b) anti-Ajuba [not stripped of anti-FLAG (p62)] and anti- $\alpha$ -tubulin (not stripped). Gel 1. Lane order: molecular weight marker, empty vector CEB, FLAG-p62 wild type CEB, FLAG-p62  $\Delta$ UBA CEB, empty vector NEB, FLAG-p62 wild type NEB, FLAG-p62  $\Delta$ UBA NEB, empty vector NEB\*, FLAG-p62 wild type NEB\*, FLAG-p62  $\Delta$ UBA NEB\*. Gel 2. Lane order: molecular weight marker, empty vector MEB, FLAG-p62 wild type MEB, FLAG-p62  $\Delta$ UBA MEB, empty vector PEB, FLAG-p62 wild type PEB, FLAG-p62  $\Delta$ UBA PEB. CEB = cytoplasmic extraction buffer. NEB = nuclear extraction buffer. NEB\* = nuclear extraction buffer, chromatin-bound. MEB = membrane extraction buffer. PEB = pellet extraction buffer (cytoskeletal).
